# Supplementary material for: Influence of H7N9 virus infection and associated treatment on human gut microbiota
Source: PubMed Central journal article supplement (PMC4614822; doi:10.1038/srep14771), 2015-10-22
Supplement: srep14771-s1.pdf [file srep14771-s1.pdf]

## Supplementary information

### **Influence of H7N9 virus infection and associated treatment on human gut microbiota**

#### **Running title: H7N9 influence on human gut microbiota**

Nan Qin<sup>1,2\*†</sup>, Beiwen Zheng<sup>1,2\*</sup>, Jian Yao<sup>1,2\*</sup>, Lihua Guo<sup>1</sup>, Jian Zuo<sup>1</sup>, Lingjiao Wu<sup>1</sup>, Jiawei Zhou<sup>1,2</sup>, Lin Liu<sup>1,2</sup>, Jing Guo<sup>1</sup>, Shujun Ni<sup>1</sup>, Ang Li<sup>1</sup>, Yixin Zhu<sup>1,2</sup>, Weifeng Liang<sup>1,2</sup>, Yonghong Xiao<sup>1,2</sup>, S. Dusko Ehrlich<sup>3,4</sup>, LanJuan Li<sup>1,2†</sup>

<sup>1</sup>State Key Laboratory for Diagnosis and Treatment of Infectious Diseases, the First Affiliated College of Medicine, Zhejiang University, 310003 Hangzhou, China; <sup>2</sup>Collaborative Innovation Center for Diagnosis and Treatment of Infectious Diseases, Zhejiang University, 310003 Hangzhou, China and <sup>3</sup>Metagenopolis, Institut National de la Recherche Agronomique, 78350, Jouy en Josas, France; <sup>4</sup>King's College London, Centre for Host-Microbiome Interactions, Dental Institute Central Office, Guy's Hospital, London Bridge, London SE1 9RT, UK.

\*These authors contributed equally to this work.

†Correspondence: Prof. Lanjuan Li, State Key Laboratory for Diagnosis and Treatment of Infectious Diseases, First Affiliated Hospital, College of Medicine, Zhejiang University, No. 79 Qingchun Rd., Hangzhou City 310003, China (ljli@zju.edu.cn). or Dr. Nan Qin, State Key Laboratory for Diagnosis and Treatment of Infectious Diseases, First Affiliated Hospital, College of Medicine, Zhejiang University, No. 79 Qingchun Rd., Hangzhou City 310003, China (nqin@zju.edu.cn).

## SUPPLEMENTARY FIGURE AND TABLE LEGENDS

**Figure S1: Clustering scores for enterotypes at the genus level using four different methods:** Prediction strength scores, Calinski-Harabasz, average silhouette scores and WB score. Each one has three different metrics. The x-axis shows the cluster number, and the y-axis shows the score.

**Figure S2: Clustering results based on the Spearman correlation coefficient of all samples.** A: At the species level. B: At the genus level.

**Table S1: Patients characteristics.**

**Table S2: Phenotype information of 31 healthy controls.**

**Table S3: Data Production of 93 samples from 26 H7N9 virus infected patients.**

**Table S4: Reference genomes downloaded from the NCBI and HMP database (version 20120810)**

**Table S5: Shannon index of the samples from the selected patients.**

**Table S6: MGS annotation.**
